# Supplementary material
Source: ML conference proceedings conference paper supplement (https://proceedings.mlr.press/v139/hu21b.html)
Supplement: Supplementary file 1 [file hu21b-supp.zip]

Archive with 2 entries (2 files):
- code.zip
- paper_with_appendix.pdf
